# Supplementary material for: Integrin signalling regulates YAP/TAZ to control skin homeostasis
Source: Oxford University Press journal article supplement (doi:10.1242/dev.133728), 2016-01-01
Supplement: dev133728supp.pdf [file dev133728supp.pdf]

| NAME                                                           | link to category                        | FDR_logFC_5SA_YAP_A431.top.txt | FDR_logFC_siYAP_siCTRL_A431.bottom.txt | FDR_logFC_siYAP_siCTRL_HaCAT.bottom.txt |
|----------------------------------------------------------------|-----------------------------------------|--------------------------------|----------------------------------------|-----------------------------------------|
| YAP signalling                                                 |                                         |                                |                                        |                                         |
| REACTOME_SIGNALING_BY_HIPPO                                    | http://www.broadinstitute.org/gsea/msig | 0.27403983                     | 0.0845902                              | 0.016429855                             |
| REACTOME_YAP1_AND_WWTR1_TAZ_STIMULATED_GENE_EXPRESSION         | http://www.broadinstitute.org/gsea/msig | 0.09720611                     | 0.27879855                             | 0.2792244                               |
| Cell cycle                                                     |                                         |                                |                                        |                                         |
| REACTOME_G1_S_TRANSITION                                       | http://www.broadinstitute.org/gsea/msig | 0.02010638                     | 0                                      | 0.000541                                |
| REACTOME_MITOTIC_M_M_G1_PHASES                                 | http://www.broadinstitute.org/gsea/msig | 0.02990606                     | 0.000957                               | 0                                       |
| REACTOME_DNA_REPLICATION                                       | http://www.broadinstitute.org/gsea/msig | 0.030264564                    | 7.26E-05                               | 0.004145181                             |
| ZHOU_CELL_CYCLE_GENES_IN_IR_RESPONSE_6HR                       | http://www.broadinstitute.org/gsea/msig | 0.031962935                    | 0                                      | 0.01134645                              |
| REACTOME_ORC1_RESERVED_FROM_CHROMATIN                          | http://www.broadinstitute.org/gsea/msig | 0.03266372                     | 0.00101811                             | 0.009737373                             |
| REACTOME_M_G1_TRANSITION                                       | http://www.broadinstitute.org/gsea/msig | 0.033798005                    | 0                                      | 0                                       |
| REACTOME_S_PHASE                                               | http://www.broadinstitute.org/gsea/msig | 0.034246594                    | 0                                      | 0.005542807                             |
| REACTOME_SYNTHESIS_OF_DNA                                      | http://www.broadinstitute.org/gsea/msig | 0.04779358                     | 0                                      | 0.005340172                             |
| REACTOME_CELL_CYCLE_CHECKPOINTS                                | http://www.broadinstitute.org/gsea/msig | 0.06410079                     | 2.78E-05                               | 0                                       |
| GRAHAM_CM1_DIVIDING_VS_NORMAL_QUIESCENT_UP                     | http://www.broadinstitute.org/gsea/msig | 0.08075432                     | 0                                      | 0.001076271                             |
| REACTOME_CYCLIN_E_ASSOCIATED_EVENTS_DURING_G1_S_TRANSITION     | http://www.broadinstitute.org/gsea/msig | 0.08450873                     | 0.021575017                            | 0.024000246                             |
| BENPORATH_PROLIFERATION                                        | http://www.broadinstitute.org/gsea/msig | 0.0936338                      | 0                                      | 0.001335144                             |
| GRAHAM_NORMAL_QUIESCENT_VS_NORMAL_DIVIDING_DN                  | http://www.broadinstitute.org/gsea/msig | 0.10780007                     | 0                                      | 0                                       |
| REACTOME_CDK_MEDIATED_PHOSPHORYLATION_AND_REMOVAL_OF_CD        | http://www.broadinstitute.org/gsea/msig | 0.11104746                     | 0.00605393                             | 0.001100282                             |
| SGCGSAAA_V52F1DP2_01                                           | http://www.broadinstitute.org/gsea/msig | 0.1132266                      | 0.000446                               | 0.36994377                              |
| REACTOME_REGULATION_OF_MITOTIC_CELL_CYCLE                      | http://www.broadinstitute.org/gsea/msig | 0.12175222                     | 0.00714292                             | 0.003874929                             |
| REACTOME_E2F_MEDIATED_REGULATION_OF_DNA_REPLICATION            | http://www.broadinstitute.org/gsea/msig | 0.123232574                    | 2.74E-05                               | 0.01285284                              |
| REACTOME_APC_C_CDH1_MEDIATED_DEGRADATION_OF_CDC20_AND_OT       | http://www.broadinstitute.org/gsea/msig | 0.12268792                     | 0.041439086                            | 0.001123692                             |
| REACTOME_APC_C_CD20_MEDIATED_DEGRADATION_OF_MITOTIC_PROT       | http://www.broadinstitute.org/gsea/msig | 0.124558374                    | 0.05772412                             | 0.00103512                              |
| V52F1_Q8                                                       | http://www.broadinstitute.org/gsea/msig | 0.1419023                      | 8.25E-05                               | 0.2755916                               |
| REN_ROUND_BY_E2F                                               | http://www.broadinstitute.org/gsea/msig | 0.15824489                     | 0                                      | 0.000168                                |
| V52F1DP2_01                                                    | http://www.broadinstitute.org/gsea/msig | 0.1583431                      | 0.000461                               | 0.36111528                              |
| V52F1DP2_01                                                    | http://www.broadinstitute.org/gsea/msig | 0.15922602                     | 0.000316                               | 0.308822                                |
| E2F1_UP_V1_UP                                                  | http://www.broadinstitute.org/gsea/msig | 0.16001372                     | 0.07726121                             | 0.13206807                              |
| V52F1DP1_01                                                    | http://www.broadinstitute.org/gsea/msig | 0.1625169                      | 0.000331                               | 0.3450875                               |
| V52F1_Q8_01                                                    | http://www.broadinstitute.org/gsea/msig | 0.1640632                      | 0.004975112                            | 0.37715355                              |
| V52F1_Q2                                                       | http://www.broadinstitute.org/gsea/msig | 0.16427012                     | 0.000364                               | 0.30976173                              |
| ISHIDA_E2F_TARGETS                                             | http://www.broadinstitute.org/gsea/msig | 0.16454798                     | 0                                      | 0                                       |
| REACTOME_ACTIVATION_OF_THE_PRE_REPLICATIVE_COMPLEX             | http://www.broadinstitute.org/gsea/msig | 0.17069401                     | 0                                      | 0.003772688                             |
| REACTOME_CELL_CYCLE_MITOTIC                                    | http://www.broadinstitute.org/gsea/msig | 0.18161228                     | 0.001131917                            | 0.024216514                             |
| V52F1DP1_01                                                    | http://www.broadinstitute.org/gsea/msig | 0.18244343                     | 0.000679                               | 0.5290016                               |
| V52F1_Q3                                                       | http://www.broadinstitute.org/gsea/msig | 0.1880097                      | 0.007132111                            | 0.5434143                               |
| V52F1_Q4                                                       | http://www.broadinstitute.org/gsea/msig | 0.18903509                     | 0.000138                               | 0.39689186                              |
| ZHOU_CELL_CYCLE_GENES_IN_IR_RESPONSE_24HR                      | http://www.broadinstitute.org/gsea/msig | 0.19078194                     | 0.008684116                            | 0.002806893                             |
| REACTOME_G2_M_CHECKPOINTS                                      | http://www.broadinstitute.org/gsea/msig | 0.19329703                     | 0                                      | 0.001109398                             |
| V52F1_Q8                                                       | http://www.broadinstitute.org/gsea/msig | 0.19384018                     | 0.000136                               | 0.3448235                               |
| WHITFIELD_CELL_CYCLE_LITERATURE                                | http://www.broadinstitute.org/gsea/msig | 0.20453149                     | 7.48E-05                               | 0.003303728                             |
| REACTOME_G1_S_SPECIFIC_TRANSCRIPTION                           | http://www.broadinstitute.org/gsea/msig | 0.20505580                     | 6.67E-05                               | 0.030043823                             |
| CHANG_CYCLING_GENES                                            | http://www.broadinstitute.org/gsea/msig | 0.21735805                     | 0                                      | 0.000558                                |
| KEGG_DNA_REPLICATION                                           | http://www.broadinstitute.org/gsea/msig | 0.21759363                     | 0                                      | 0.11667396                              |
| REACTOME_DNA_STRAND_ELONGATION                                 | http://www.broadinstitute.org/gsea/msig | 0.2220706                      | 0                                      | 0.048146147                             |
| REACTOME_MITOTIC_G1_G1_S_PHASES                                | http://www.broadinstitute.org/gsea/msig | 0.22380826                     | 0                                      | 0.001282028                             |
| KONG_E2F_TARGETS                                               | http://www.broadinstitute.org/gsea/msig | 0.22829128                     | 0                                      | 0.000138                                |
| OLSON_E2F_TARGETS_DN                                           | http://www.broadinstitute.org/gsea/msig | 0.25124517                     | 0.18841921                             | 0.3222239                               |
| KAUFFMANN_DNA_REPLICATION_GENES                                | http://www.broadinstitute.org/gsea/msig | 0.25262678                     | 0                                      | 0.059563834                             |
| Cell growth                                                    |                                         |                                |                                        |                                         |
| REACTOME_MRNA_PROCESSING                                       | http://www.broadinstitute.org/gsea/msig | 0.012915894                    | 0.002623442                            | 0.001638745                             |
| BURTON_ADIPONECTIN_PEAK_AT_16HR                                | http://www.broadinstitute.org/gsea/msig | 0.035835117                    | 0                                      | 0.0853237                               |
| REACTOME_TRNA_AMINOACYLATION                                   | http://www.broadinstitute.org/gsea/msig | 0.046430897                    | 0.1984875                              | 0.004750761                             |
| RNA_PROCESSING                                                 | http://www.broadinstitute.org/gsea/msig | 0.04649598                     | 0.001356013                            | 0.011267367                             |
| KEGG_SPLICING                                                  | http://www.broadinstitute.org/gsea/msig | 0.057477616                    | 0.057894554                            | 0.13498631                              |
| REACTOME_REGULATION_OF_ORNITHINE_DECARBOXYLASE_ODC             | http://www.broadinstitute.org/gsea/msig | 0.06119907                     | 0.028434383                            | 0.005405107                             |
| KEGG_AMINOACYL_TRNA_BIOSYNTHESIS                               | http://www.broadinstitute.org/gsea/msig | 0.06144109                     | 0.23855021                             | 0.013823001                             |
| MRNA_PROCESSING_0006397                                        | http://www.broadinstitute.org/gsea/msig | 0.08926187                     | 0.01572194                             | 0.012224521                             |
| REACTOME_TRANSCRIPTION                                         | http://www.broadinstitute.org/gsea/msig | 0.09406843                     | 0                                      | 0.007614609                             |
| REACTOME_RNA_POL_I_TRANSCRIPTION                               | http://www.broadinstitute.org/gsea/msig | 0.104830325                    | 0.059167907                            | 0.012420549                             |
| RNA_SPLICING_VIA_TRANSESTERIFICATION_REACTIONS                 | http://www.broadinstitute.org/gsea/msig | 0.10811508                     | 0.11179424                             | 0.21043202                              |
| RNA_HELICASE_ACTIVITY                                          | http://www.broadinstitute.org/gsea/msig | 0.120443721                    | 0.2004321                              | 0.08311878                              |
| REACTOME_MRNA_SPLICING_MINOR_PATHWAY                           | http://www.broadinstitute.org/gsea/msig | 0.20327962                     | 0.028316427                            | 0.017792491                             |
| REACTOME_RNA_POL_I_RNA_POL_III_AND_MITOCHONDRIAL_TRANSCRIPT    | http://www.broadinstitute.org/gsea/msig | 0.23740312                     | 0                                      | 0.04974437                              |
| REACTOME_TRANSPORT_OF_MATURING_MRNA_DERIVED_FROM_AN_INTRON     | http://www.broadinstitute.org/gsea/msig | 0.24279736                     | 0.049280223                            | 0.04197069                              |
| REACTOME_TRANSPORT_OF_RIBONUCLEOPROTEINS_INTO_THE_HOST_NUCLEUS | http://www.broadinstitute.org/gsea/msig | 0.26221517                     | 0.05235285                             | 0.04195959                              |
| SPLICING                                                       | http://www.broadinstitute.org/gsea/msig | 0.27259094                     | 0.23129094                             | 0.02454544                              |
| REACTOME_PROCESSING_OF_CAPPED_INTRONLESS_PRE_MRNA              | http://www.broadinstitute.org/gsea/msig | 0.27634937                     | 0.23457132                             | 0.042890634                             |
| RNA_POLYMERASE_ACTIVITY                                        | http://www.broadinstitute.org/gsea/msig | 0.28282723                     | 0.023127701                            | 0.044442423                             |
| Cancer/metastasis                                              |                                         |                                |                                        |                                         |
| GRADE_COLOR_AND_RECTAL_CANCER_UP                               | http://www.broadinstitute.org/gsea/msig | 0.03838893                     | 0.21228471                             | 0.003991324                             |
| KOBAYASHI_EGFR_SIGNALING_24HR_DN                               | http://www.broadinstitute.org/gsea/msig | 0.0505721                      | 0                                      | 0.000573                                |
| SCHLOSSER_MYC_TARGETS_REPRESSED_BY_SERUM                       | http://www.broadinstitute.org/gsea/msig | 0.030234784                    | 0.021466859                            | 0                                       |
| SOTIRIOU_BREAST_CANCER_GRADE_1_VS_3_UP                         | http://www.broadinstitute.org/gsea/msig | 0.033990975                    | 0                                      | 0                                       |
| BOYAUULT_LIVER_CANCER_SUBCLASS_G3_UP                           | http://www.broadinstitute.org/gsea/msig | 0.043235235                    | 0.004435256                            | 0.018923517                             |
| NAKAMURA_CANCER_MICROENVIRONMENT_DN                            | http://www.broadinstitute.org/gsea/msig | 0.048736367                    | 0.00668                                | 0.15767501                              |
| SABRIO_EPITHELIAL_MESENCHYMAL_TRANSITION_UP                    | http://www.broadinstitute.org/gsea/msig | 0.06540228                     | 0.06540228                             | 0.031196701                             |
| WINNENFENICK_MELANOMA_METASTASIS_UP                            | http://www.broadinstitute.org/gsea/msig | 0.0807091                      | 0.000266                               | 0.001537526                             |
| RHODES_UNDIFFERENTIATED_CANCER                                 | http://www.broadinstitute.org/gsea/msig | 0.10512301                     | 0.001352914                            | 0.00111937                              |
| KAUFFMANN_MELANOMA_RELAPSE_UP                                  | http://www.broadinstitute.org/gsea/msig | 0.105220415                    | 0                                      | 0.007739451                             |
| TOMIDA_METASTASIS_UP                                           | http://www.broadinstitute.org/gsea/msig | 0.10571032                     | 0.041445088                            | 0.21375494                              |
| VECCO_GASTRIC_CANCER_EARLY_UP                                  | http://www.broadinstitute.org/gsea/msig | 0.207774                       | 0.207774                               | 0.05323398                              |
| ODONNELL_TARGETS_OF_MYC_AND_TFRC_DN                            | http://www.broadinstitute.org/gsea/msig | 0.26681277                     | 0.001433474                            | 0.028167572                             |
| CRONQUIST_NRAS_SIGNALING_DN                                    | http://www.broadinstitute.org/gsea/msig | 0.29664127                     | 0                                      | 0.000191                                |
| DANG_MYC_TARGETS_UP                                            | http://www.broadinstitute.org/gsea/msig | 0.29295662                     | 0.16562039                             | 0                                       |
| BORCEKUX_MALIGNANT_MESOTHELIOMA_UP                             | http://www.broadinstitute.org/gsea/msig | 0.2960386                      | 0.25912035                             | 0.17807612                              |
| RHODES_CANCER_METASTASIS_SIGNATURE                             | http://www.broadinstitute.org/gsea/msig | 0.2927492                      | 0.15227412                             | 0.024029912                             |
| DANG_MYC_TARGETS_UP                                            | http://www.broadinstitute.org/gsea/msig | 0.29295662                     | 0.16562039                             | 0                                       |
| BOYAUULT_LIVER_CANCER_SUBCLASS_G123_UP                         | http://www.broadinstitute.org/gsea/msig | 0.29370321                     | 0.08395546                             | 0.049637258                             |
| SHEDDEN_LUNG_CANCER_POOR_SURVIVAL_A6                           | http://www.broadinstitute.org/gsea/msig | 0.29377588                     | 0.000135                               | 0.01669378                              |
| PUANA_BREAST_CANCER_UT_NETWORK                                 | http://www.broadinstitute.org/gsea/msig | 0.27327272                     | 0.003610279                            | 0.024503974                             |
| DAIRKEE_CANCER_PHONE_RESPONSE_BPA                              | http://www.broadinstitute.org/gsea/msig | 0.2751443                      | 0.22182393                             | 0.052520353                             |
| SMID_BREAST_CANCER_LUMINAL_A_DN                                | http://www.broadinstitute.org/gsea/msig | 0.29719597                     | 0.020338075                            | 0.005284015                             |

TEAD binding site analysis:

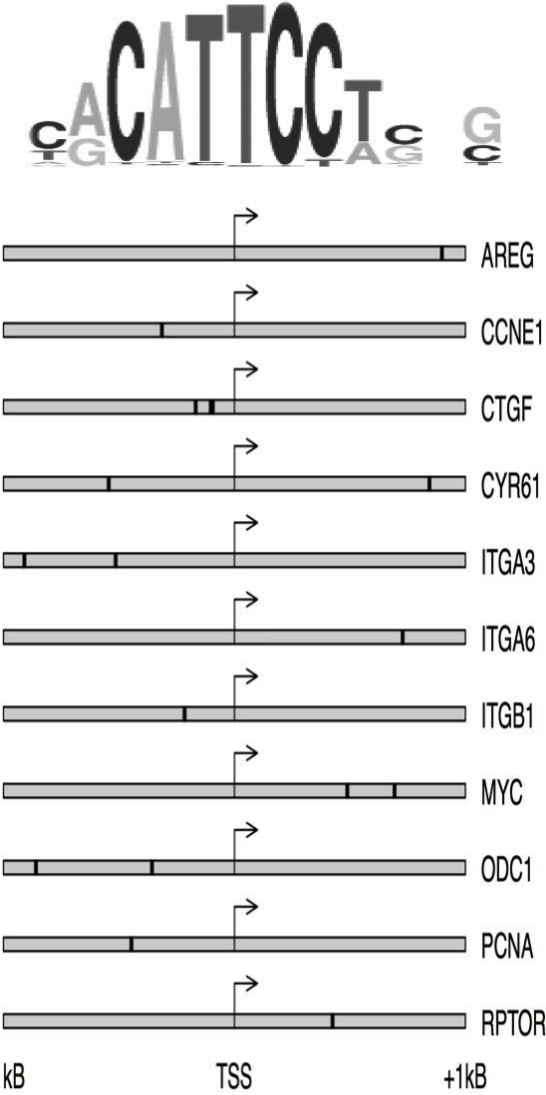

**Fig. S1. Gene set enrichment analysis of YAP target genes in keratinocytes.** RNAseq analysis was performed on A431 keratinocytes transfected with YAP5SA or siRNA against YAP. Results were compared to HaCaT keratinocytes. Gene sets induced upon YAP5SA expression and decreased upon YAP siRNA are listed in the table. Individual genes that are crucial regulators of each gene set contain several TEAD-specific binding motifs within 1kb of their transcription start sites.

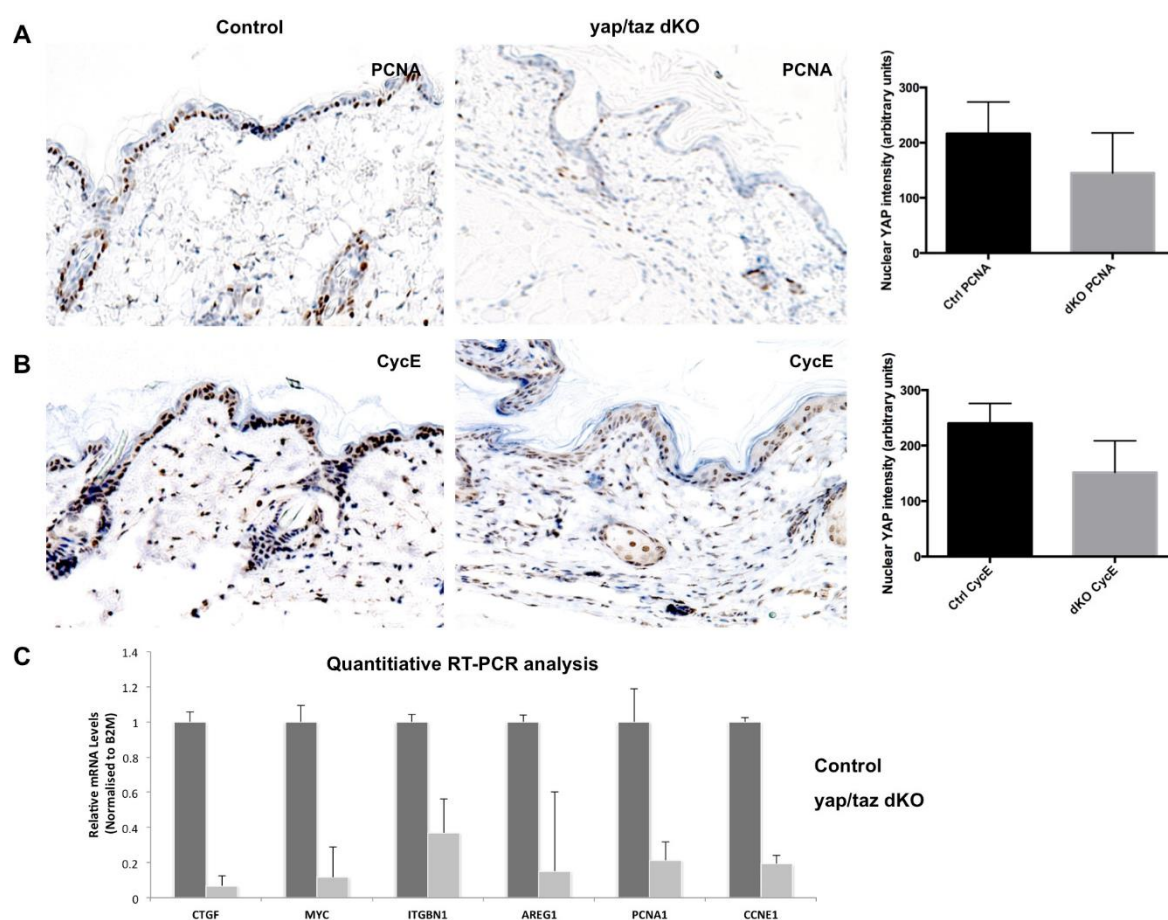

**Fig. S2. Reduction in YAP/TAZ target gene expression in yap/taz double knockout skin.** Several YAP-dependent genes identified in RNAseq experiments were selected for analysis in wild type versus yap/taz double conditional knockout skin. (A) We find downregulation of PCNA at the protein level by immunostaining. Quantitation was performed on  $n=300$  cells from at least 3 different mice. (B) We find downregulation of CyclinE at the protein level by immunostaining. Quantitation was performed on  $n=300$  cells from at least 3 different mice. (C) We find downregulation of multiple YAP-dependent genes at the mRNA level by quantitative RT-PCR.

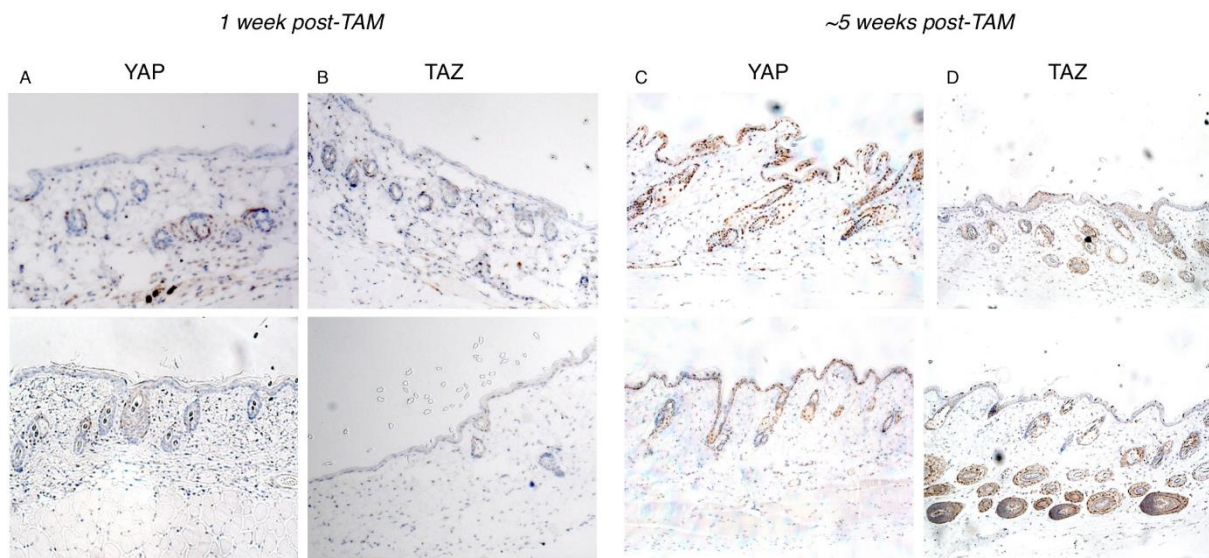

**Fig. S3. Repopulation of YAP/TAZ dKO skin by cells escaping Cre-mediated recombination.** (A) YAP staining is low in backskin 1 week post-tamoxifen administration (note mosaic deletion). (B) TAZ staining is low in backskin 1 week post-tamoxifen administration. (C) YAP staining is increased in the basal cells of the epidermis, similar to wild type levels, in backskin ~5 week post-tamoxifen administration. (D) TAZ staining is increased in the basal cells of the epidermis, similar to wild type levels, in backskin ~5 week post-tamoxifen administration.



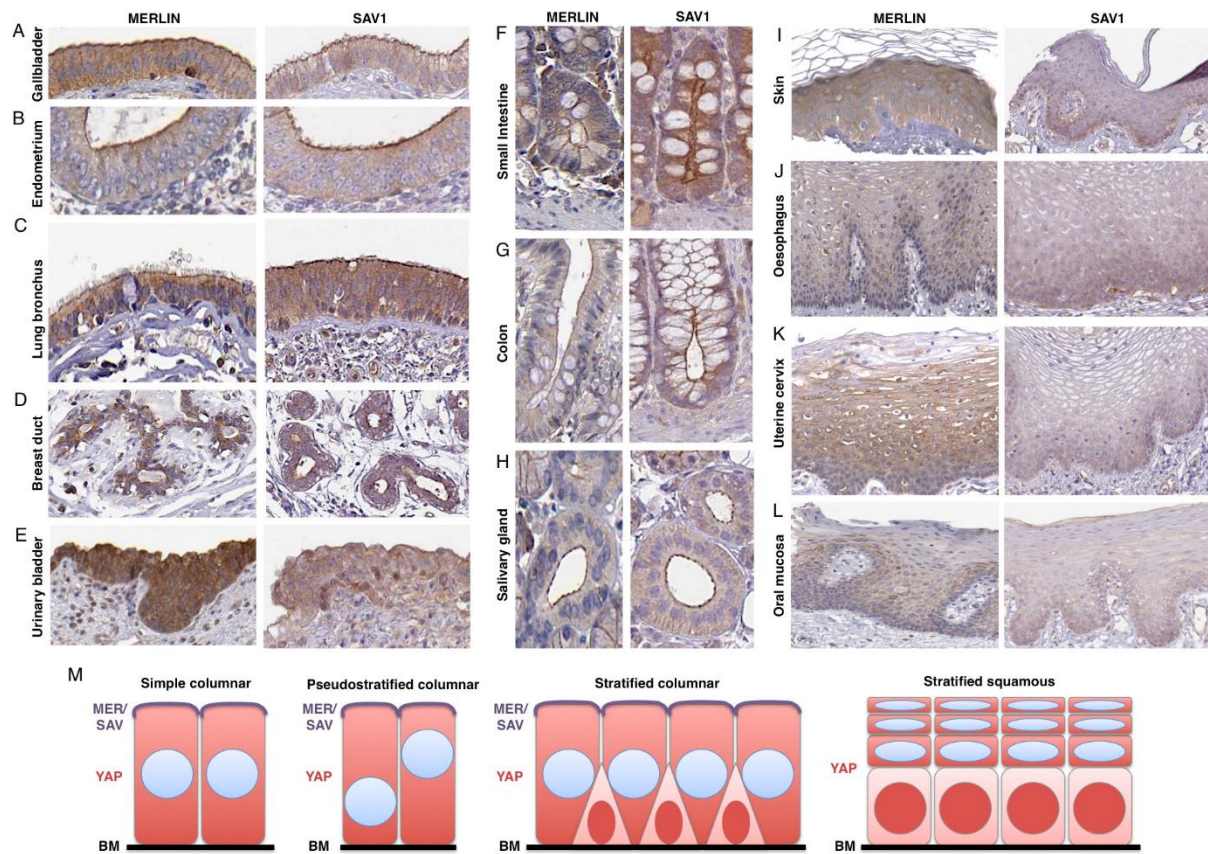

**Fig. S4. Merlin and Sav localise in the same manner as Crb3.** (A-L) MERLIN and SAV1 localise in the same apical manner as CRB3 in columnar cells of various epithelia. Compare with Fig 3. (M) Schematic diagram of MER/SAV localisation in various epithelial types.

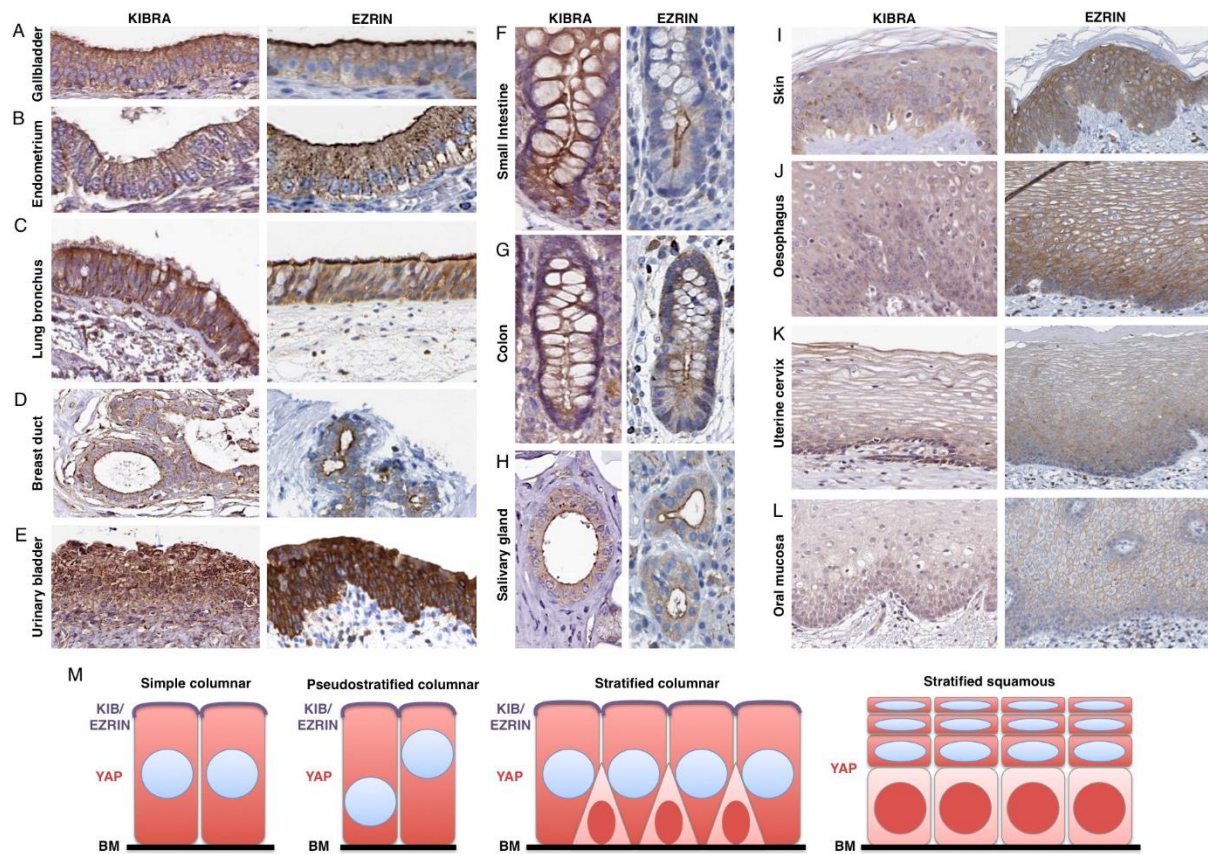

**Fig. S5. Kibra and Ezrin localise in the same manner as Crb3.** (A-L) KIB and EZR localise in the same apical manner as CRB3 in columnar cells of various epithelia. Compare with Fig 3. (M) Schematic diagram of KIB/EZR localisation in various epithelial types.



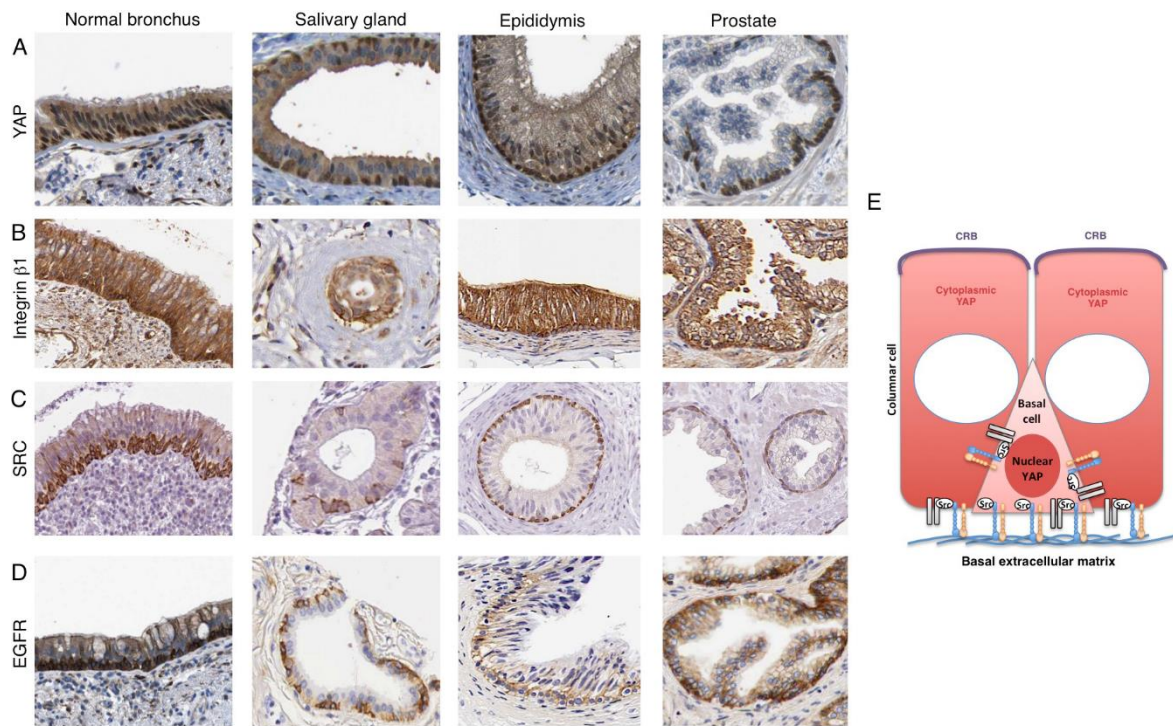

**Fig. S6. Integrin-Src-EGFR-YAP localisation in stratified columnar epithelia.** Human Protein Atlas data were mined to examine the localisation and expression of YAP, ITGB1, SRC and EGFR. (A) YAP localises to the nucleus in basal layer stem/progenitor cells of bronchus, salivary gland, epididymis and prostate. (B) ITGB1 is expressed in the basal layer stem/progenitor cells of bronchus, salivary gland, epididymis and prostate. (C) SRC is expressed in the basal layer stem/progenitor cells of bronchus, salivary gland, epididymis and prostate. (D) EGFR is expressed in the basal layer stem/progenitor cells of bronchus, salivary gland, epididymis and prostate. (E) Schematic diagram of YAP regulation in stratified columnar epithelia.

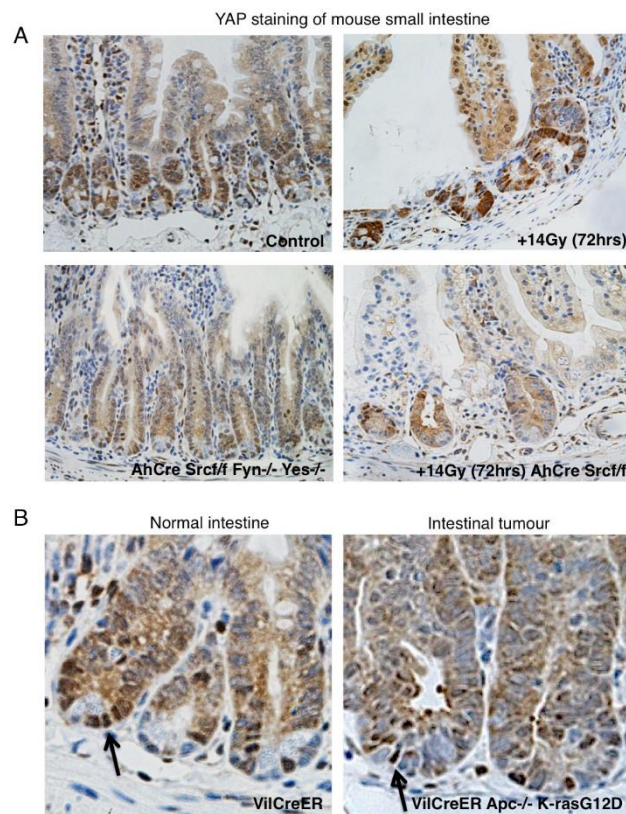

**Fig. S7. Src is required for YAP activation after intestinal irradiation.** (A) Mouse small intestines stained for YAP before and after 72hrs of gamma-irradiation with 14Gy. Note elevation of YAP levels in crypt progenitor cells. Note decreased YAP levels and nuclear localisation in Src, Fyn, Yes triple knockout intestines or in Src single knockout intestines after 14Gy irradiation. (B) Mouse small intestines from control (Villin-CreER) and Apc K-RasG12D intestines featuring hyperproliferative crypt progenitor expansion. Note that only basal crypt cells feature nuclear YAP, while columnar epithelial cells feature mostly cytoplasmic YAP localisation. Thus, loss of Apc or gain of Ras signalling is not sufficient to induce YAP nuclear localisation *in vivo*.

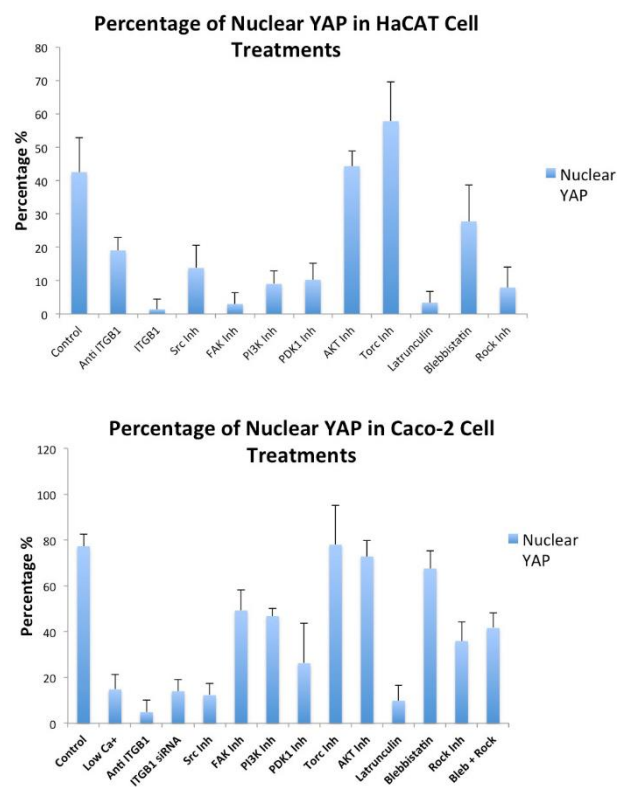

**Fig. S8. Comparison of YAP perturbation in HaCAT and Caco-2 cells.** Data from Fig 4E and 7G are reproduced to enable direct comparison.
